# Supplementary material
Source: PubMed Central journal article supplement (PMC4052224)
Supplement: NIHMS576370-supplement-1.pdf [file NIHMS576370-supplement-1.pdf]

Supplementary Figure 1

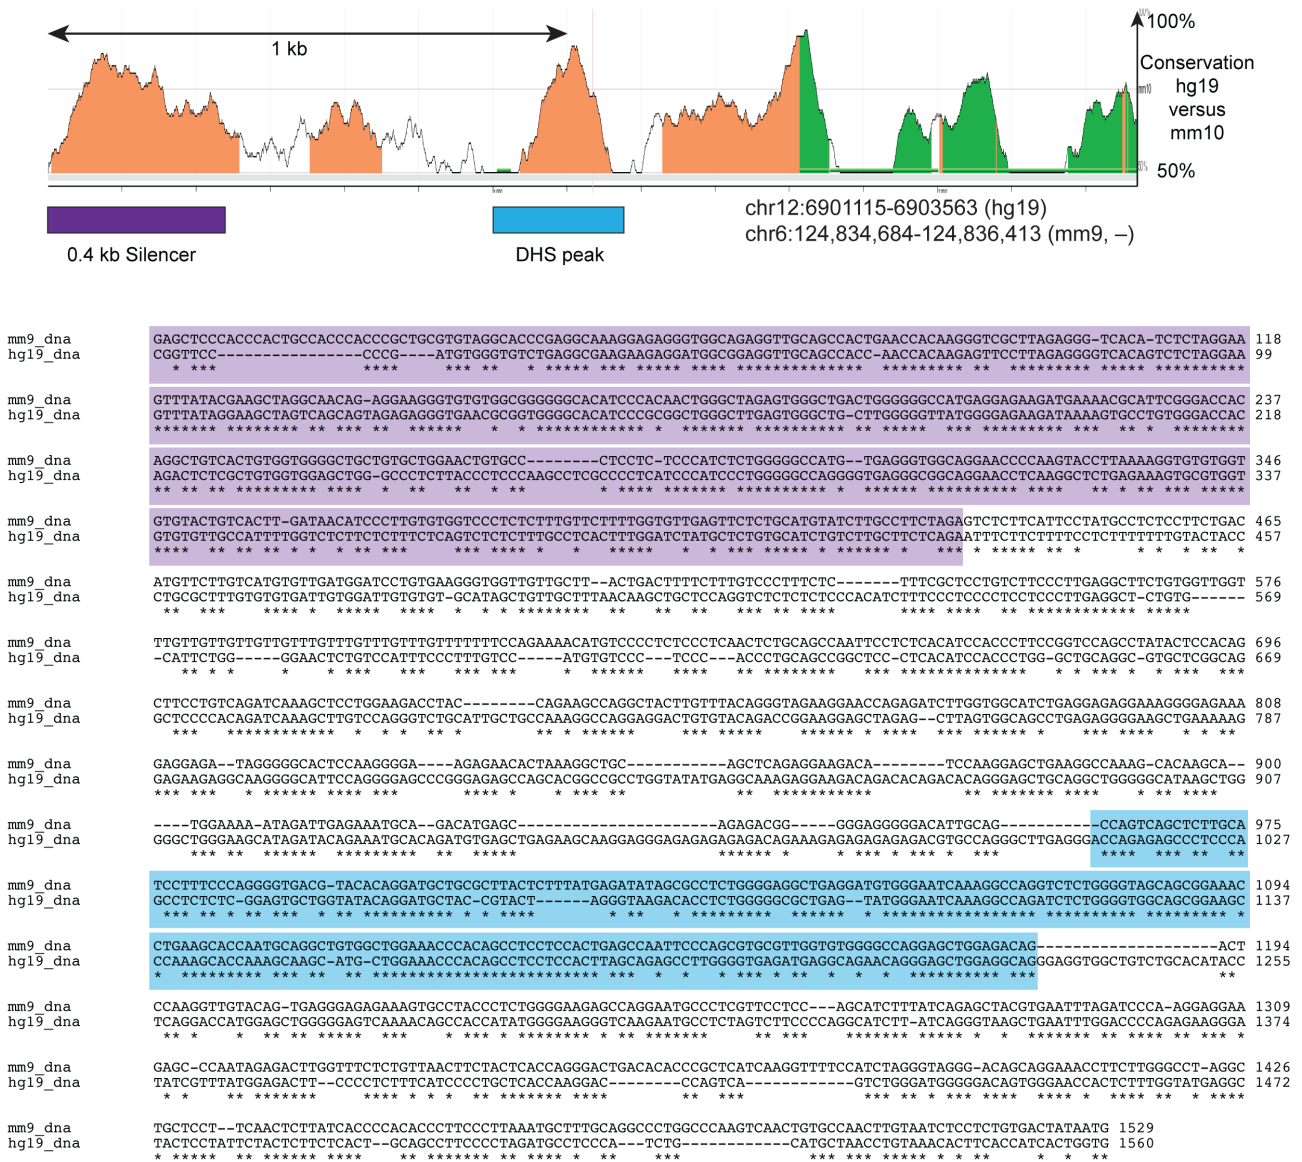

**Supplementary Fig. 1.** Sequence conservation of the *Cd4* silencer and DHS+3 between human and mouse genomes.

Sequence conservation analysis of the 1.5 kb sequence encompassing the *Cd4* silencer and DHS+3 between human and mouse genomes is shown as histogram and an alignment at the nucleotide level. Regions conserved >60% are shown in orange and repetitive sequences are shown in green as default in the ECR browser (<http://ecrbrowser.dcode.org/>). Sequence alignment at the nucleotide level is shown in the lower panel. The 0.4 kb silencer and the peak of DHS+3 shown in Fig. 1 are marked in purple and blue, respectively.

Supplementary Figure 2

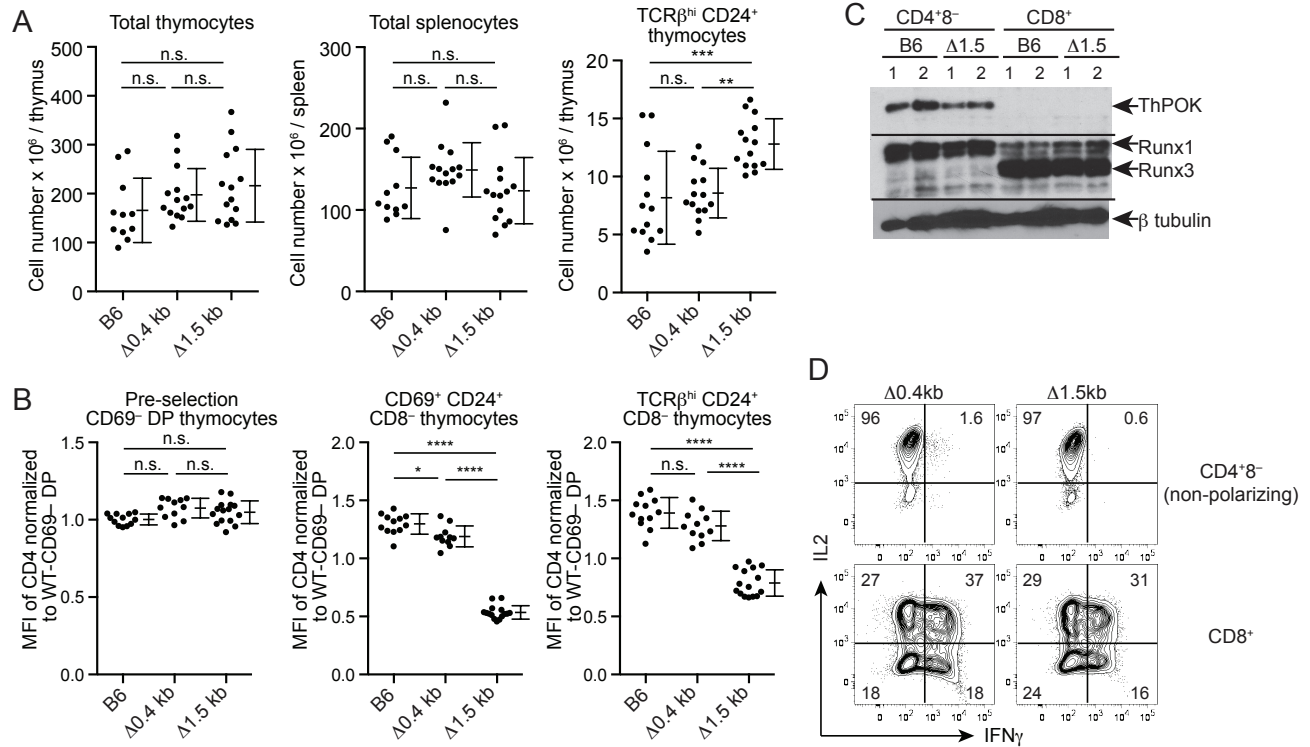

**Supplementary Fig. 2.** Analysis of T cell development in *Cd4(0.4k)*<sup>-/-</sup> and *Cd4(1.5k)*<sup>F/F</sup>; *Cd4-cre* mice. (A) Statistical analysis of numbers of total thymocytes, total splenocytes, and TCRβ<sup>hi</sup> CD24<sup>lo/-</sup> mature thymocytes in B6, *Cd4(0.4k)*<sup>-/-</sup> (Δ0.4kb) and *Cd4(1.5k)*<sup>F/F</sup>; *Cd4-cre* (Δ1.5kb) mice. (B) Statistical analysis of mean fluorescence intensities (MFI) of CD4 expression in pre-selection CD69<sup>-</sup> DP thymocytes, CD69<sup>+</sup> CD24<sup>+</sup> CD8<sup>-</sup> post-selection thymocytes, and TCRβ<sup>hi</sup> CD24<sup>lo/-</sup> CD8<sup>-</sup> mature thymocytes. Data are shown as means and SD and statistical differences were tested by one-way ANOVA. N=9-15. (C) Expression of ThPOK, Runx1 and Runx3 proteins in CD4<sup>+</sup> CD8<sup>-</sup> and CD8<sup>+</sup> T cells from Δ1.5kb and control B6 mice. Whole cell extract of two independent sets of CD4<sup>+</sup> CD8<sup>-</sup> and CD8<sup>+</sup> T cells from Δ1.5kb and control B6 mice was separated by SDS-PAGE and subjected to immunoblotting. Anti-β tubulin antibody was used to measure loading. (D) IL-2 and IFNγ expression in CD4<sup>+</sup> CD8<sup>-</sup> and CD8<sup>+</sup> T cells cultured under non-polarizing conditions. Percentages of IL-2<sup>+</sup> and IFNγ<sup>+</sup> cells are shown. Data represent three experiments with similar results.

Supplementary Figure 3

A

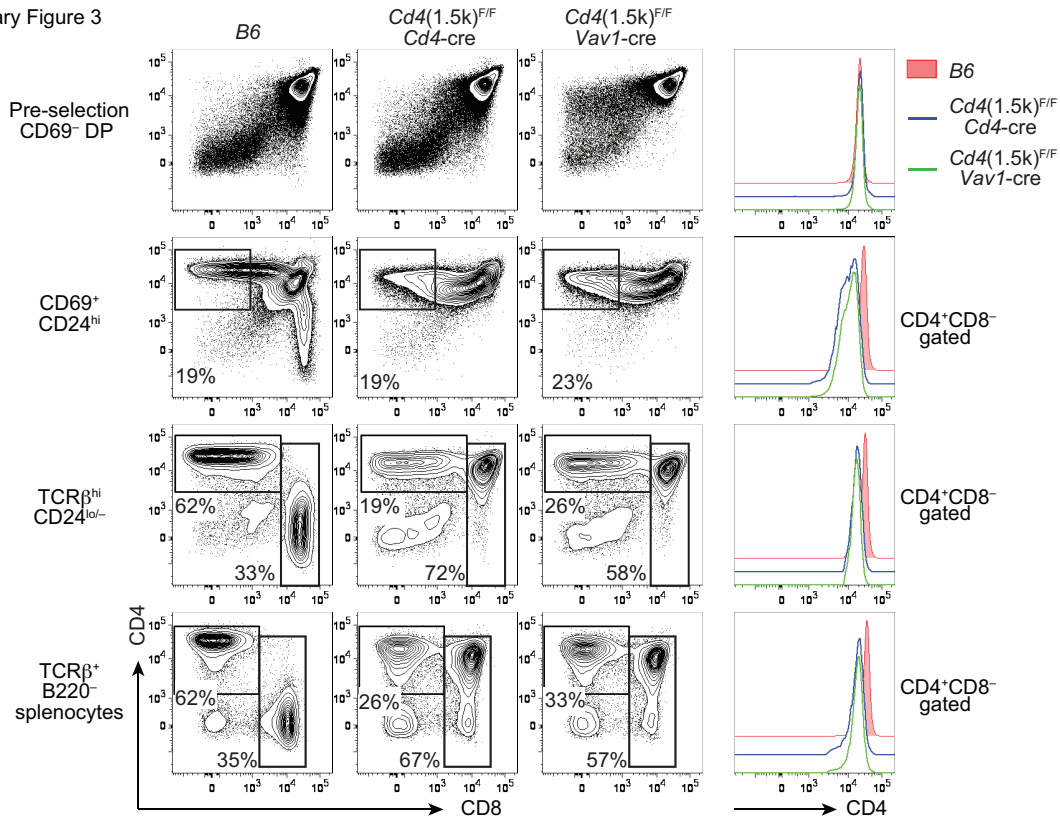

B

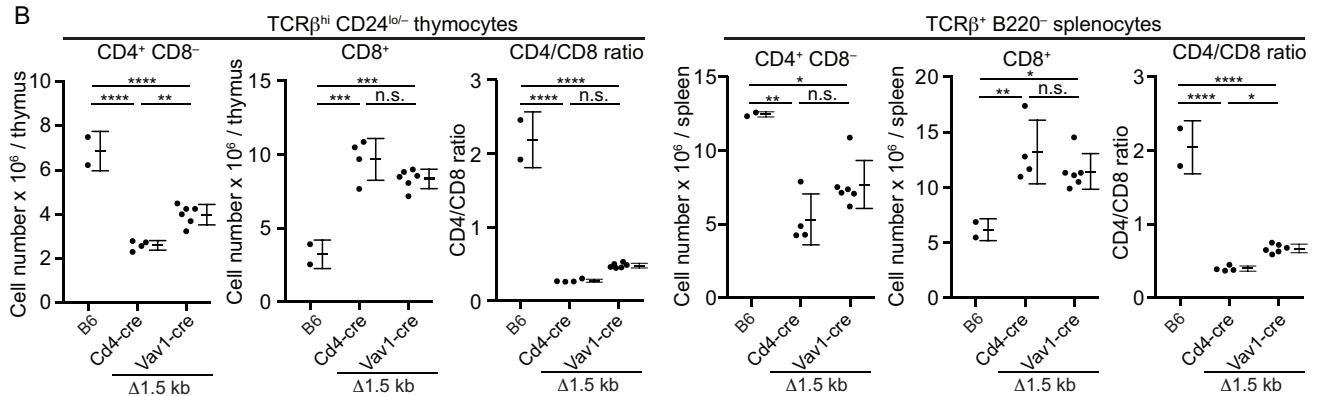

**Supplementary Fig.3.** Comparison of CD4 expression levels and T cell development in *Cd4(1.5k)<sup>F/F</sup>; Cd4-cre* mice and *Cd4(1.5k)<sup>F/F</sup>; Vav1-cre* mice.

(A) CD4 and CD8 expression in developing T cells from age-matched B6, *Cd4(1.5k)<sup>F/F</sup>; Cd4-cre* mice and *Cd4(1.5k)<sup>F/F</sup>; Vav1-cre* mice was analyzed as in Fig. 2. Percentages of gated populations in representative samples are shown. (B) Statistical analysis of numbers of CD4<sup>+</sup> CD8<sup>-</sup> and CD8<sup>+</sup> mature thymocytes, and CD4<sup>+</sup> CD8<sup>-</sup> and CD8<sup>+</sup> T cells in the spleen and CD4, and CD4/CD8 ratios. N=2 (B6), 4 (*Cd4-cre*), and 6 (*Vav1-cre*). Statistical differences were tested by one-way ANOVA.
